# Supplementary material for: Are n-3 PUFAs from Microalgae Incorporated into Membrane and Storage Lipids in Pig Muscle Tissues?—A Lipidomic Approach
Source: PubMed Central journal article supplement (PMC9301695; doi:10.1021/acsomega.2c02476), 2022-07-08
Supplement: ao2c02476_si_002.pdf [file ao2c02476_si_002.pdf]

# Are n-3 PUFA from microalgae incorporated into membrane- and storage lipids in pig muscle tissues? – A lipidomic approach

Dirk Dannenberger<sup>1\*,a</sup>, Anja Eggert<sup>2,a</sup>, Claudia Kalbe<sup>1</sup>, Anna Woitalla<sup>3</sup> and Dominik Schwudke<sup>3,4,5</sup>

<sup>1</sup>Research Institute for Farm Animal Biology, Institute of Muscle Biology and Growth, Lipid Metabolism and muscular Adaptation workgroup, 18196 Dummerstorf, Germany, dannenberger@fhn-dummerstorf.de, kalbe@fhn-dummerstorf.de

<sup>2</sup>Research Institute for Farm Animal Biology, Institute of Genetics and Biometry, 18196 Dummerstorf, Germany, eggert@fhn-dummerstorf.de

<sup>3</sup>Research Center Borstel – Leibniz Lung Center, Division of Bioanalytical Chemistry, 23845 Borstel, Germany, dschwudke@fz-borstel.de, awoitalla@fz-borstel.de

<sup>4</sup>German Center for Lung Research (DZL), Airway Research Center North (ARCN), Research Center Borstel - Leibniz Lung Center, 23845 Borstel, Germany, dschwudke@fz-borstel.de

<sup>5</sup>German Center for Infection Research, Thematic Translational Unit Tuberculosis, Research Center Borstel- Leibniz Lung Center, 23845 Borstel, Germany, dschwudke@fz-borstel.de

The supporting Information includes the file (Supplemented figure 1.pptx)

S4 Exemplary MS spectra of muscle tissue lipid extracts in the positive ion mode

S5 Exemplary MS<sup>2</sup> spectra of TAG 52:2 present in muscle tissue lipid extracts

S6 Exemplary MS<sup>2</sup> spectra of TAG 56:6 present in muscle tissue lipid extracts

S7 Exemplary MS<sup>2</sup> spectra of TAG 54:6 present in muscle tissue lipid extracts

# Supplement Figure 1

F:\LX\_Versions\...\180711\_36722\_a

07/11/18 12:05:48

36722

180711\_36722\_a #29-743 RT: 0.69-4.65 AV: 7 N  
T: FTMS + p NSI Full ms [800.0000-950.0000]

## Control (A)

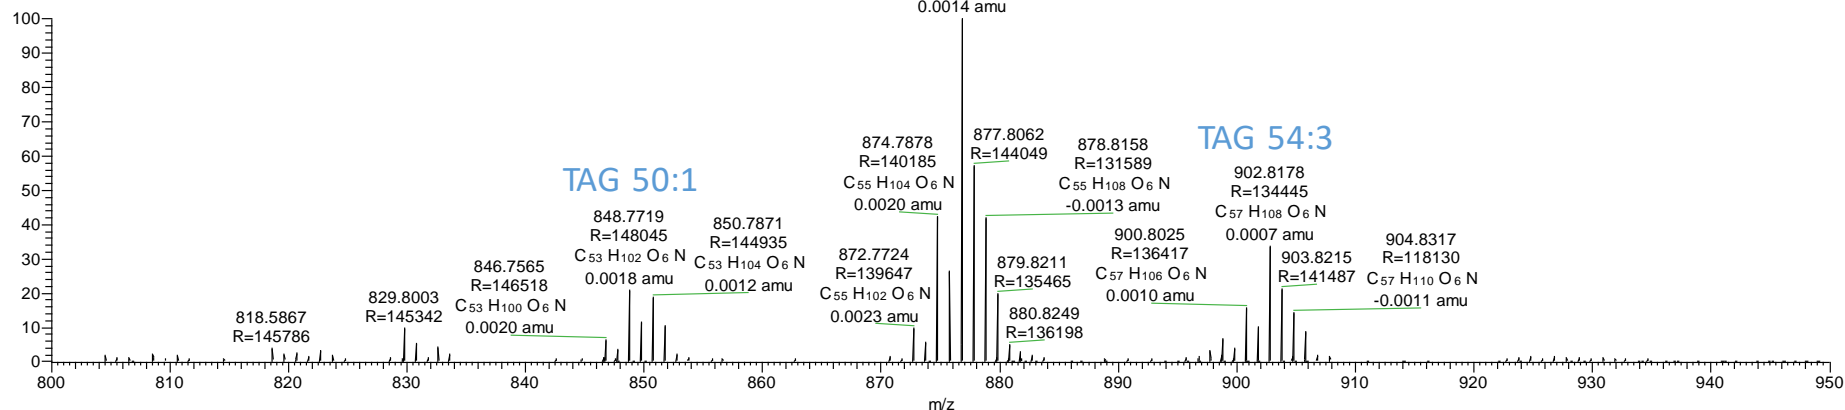

F:\LX\_Versions\...\180711\_36724\_a

07/11/18 12:27:44

36724

180711\_36724\_a #28-744 RT: 0.68-4.64 AV: 7 N  
T: FTMS + p NSI Full ms [800.0000-950.0000]

## Microalgae (B)

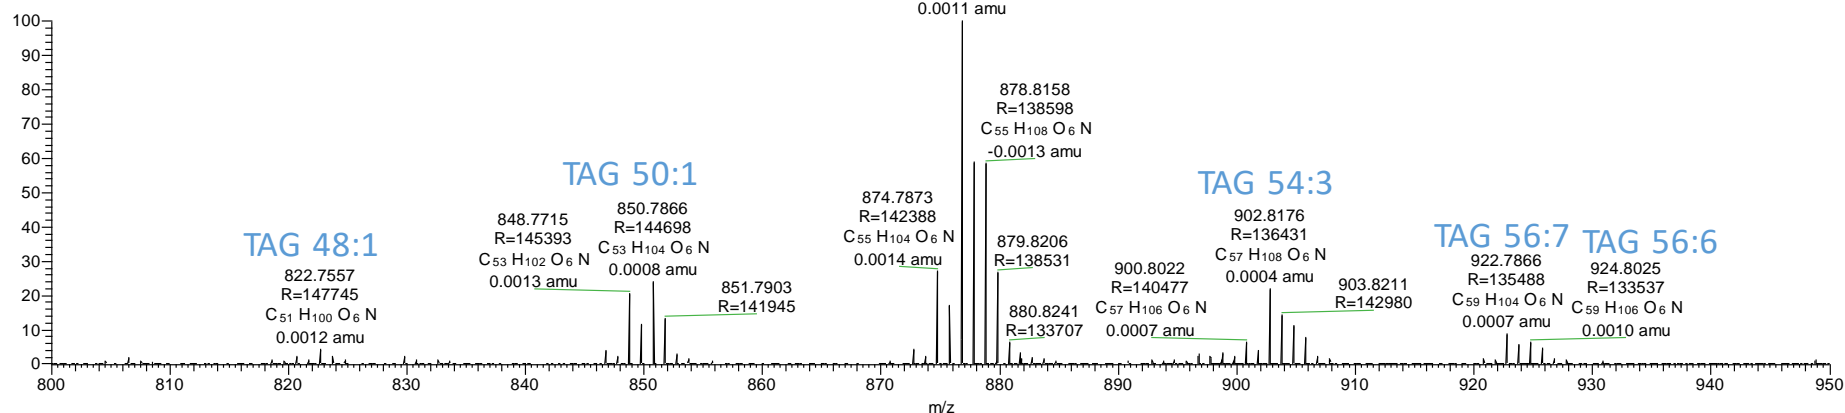

S4 Exemplary MS spectra of muscle tissue lipid extracts in the positive ion mode. TAGs are ionized as  $[M+NH_4]^+$  adduct ions.

The  $m/z$  region 800-950 is shown for A) control diet B) diet supplemented with microalgae.

Main TAG species are assigned including  $m/z$ , resolution (R), chemical sum composition and mass difference.

# Supplement Figure 2

180711\_36722\_a #617 RT: 4.15 AV: 1 NL: 3.72E  
T: FTMS + p NSI Full ms2 876.7260@hcd30.00 [180.

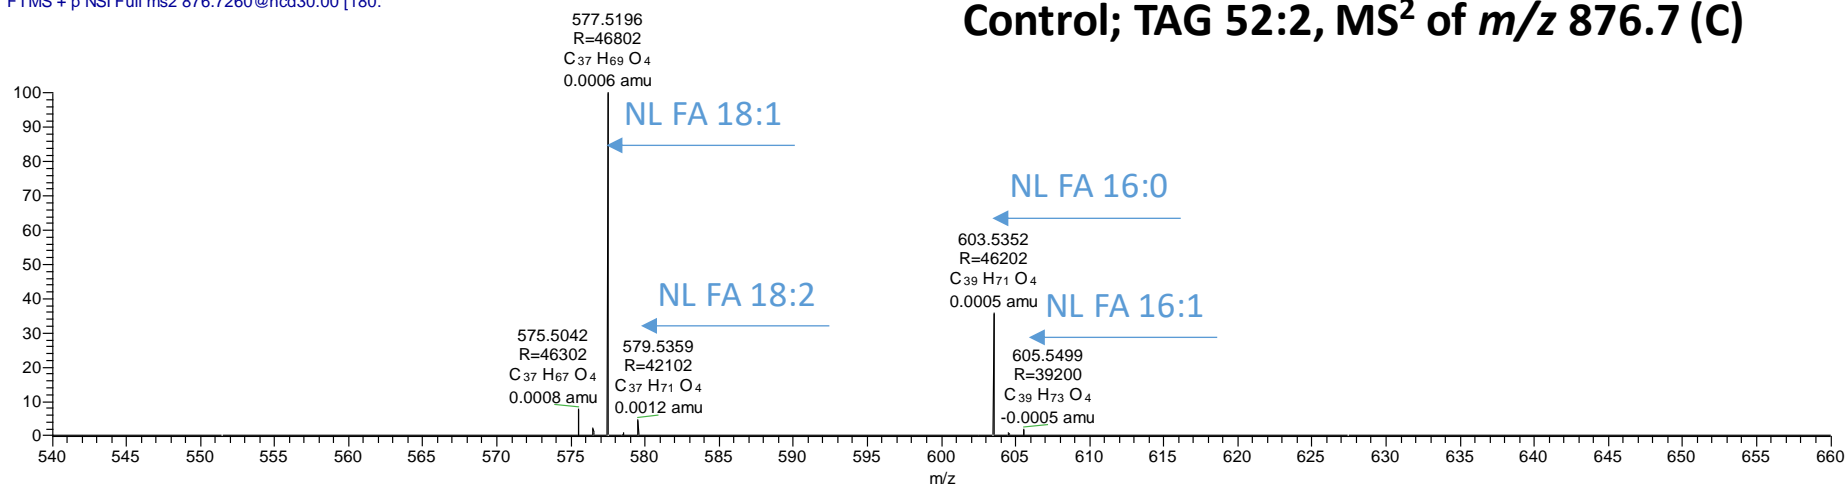

180711\_36724\_a #616 RT: 4.15 AV: 1 NL: 1.08E  
T: FTMS + p NSI Full ms2 876.7260@hcd30.00 [180.

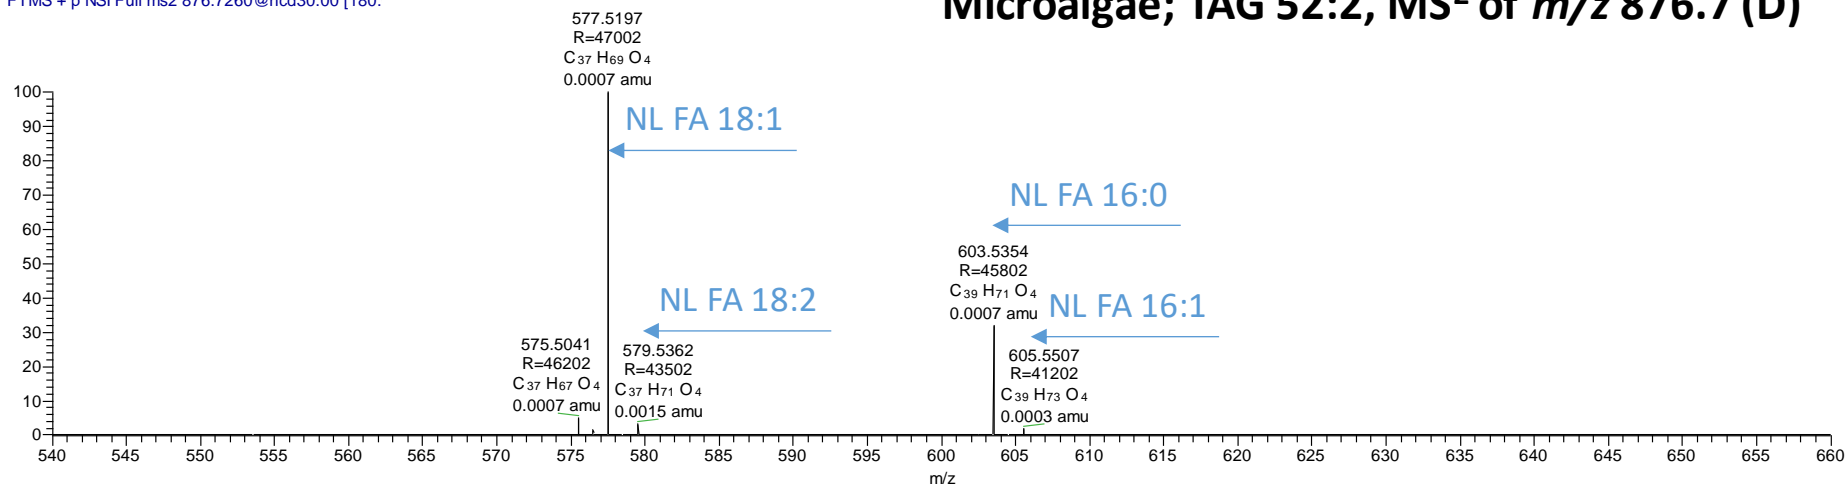

S5 Exemplary MS<sup>2</sup> spectra of TAG 52:2 present in muscle tissue lipid extracts C) control diet D) diet supplemented with microalgae. Major peaks are assigned according to earlier described fragmentation of [TAG+NH<sub>4</sub>]<sup>+</sup> adduct ions that undergo a neutral loss (NL) of the fatty acid and ammonia [35]. The spectral region (*m/z* 540-660) is shown for better overview on the resulting [DAG-OH]<sup>+</sup> fragment ions.

# Supplement Figure 3

180711\_36722\_a #665 RT: 4.38 AV: 1 NL: 6.27E  
T: FTMS + p NSI Full ms2 924.7740@hcd30.00 [180.

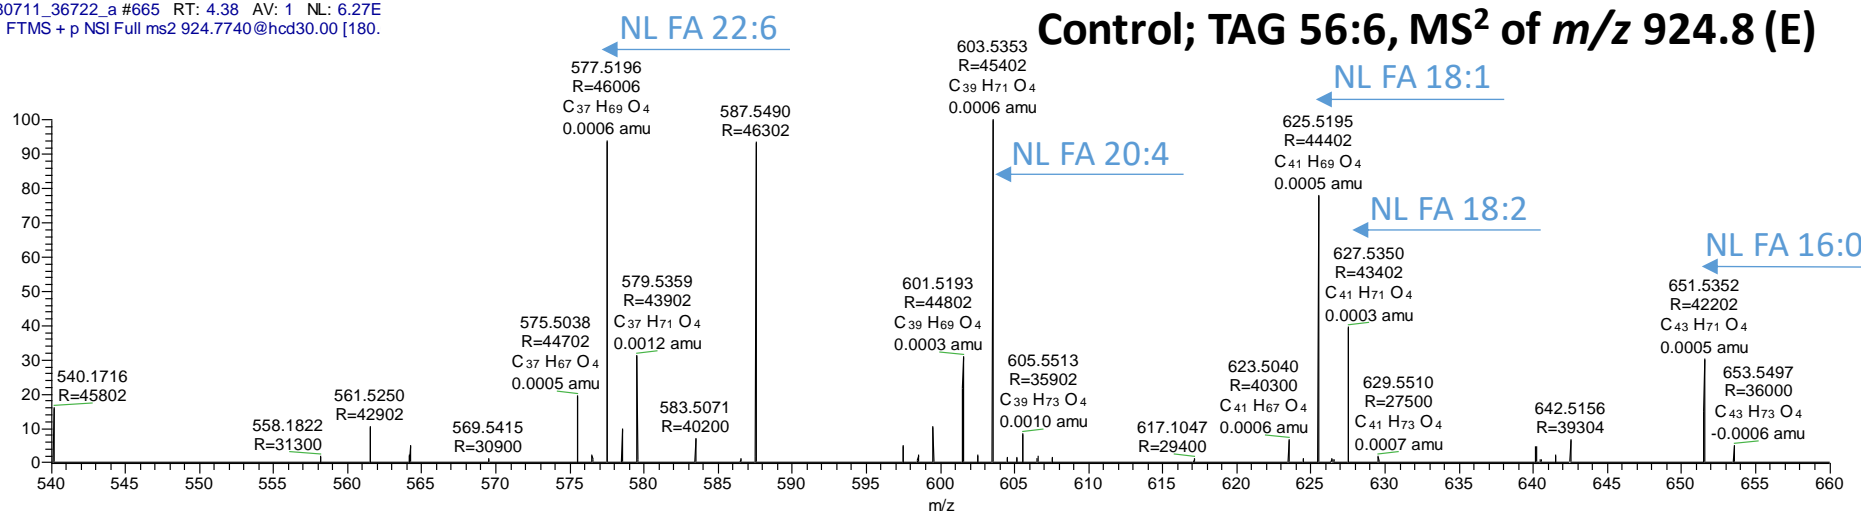

180711\_36724\_a #664 RT: 4.37 AV: 1 NL: 2.18E  
T: FTMS + p NSI Full ms2 924.7740@hcd30.00 [180.

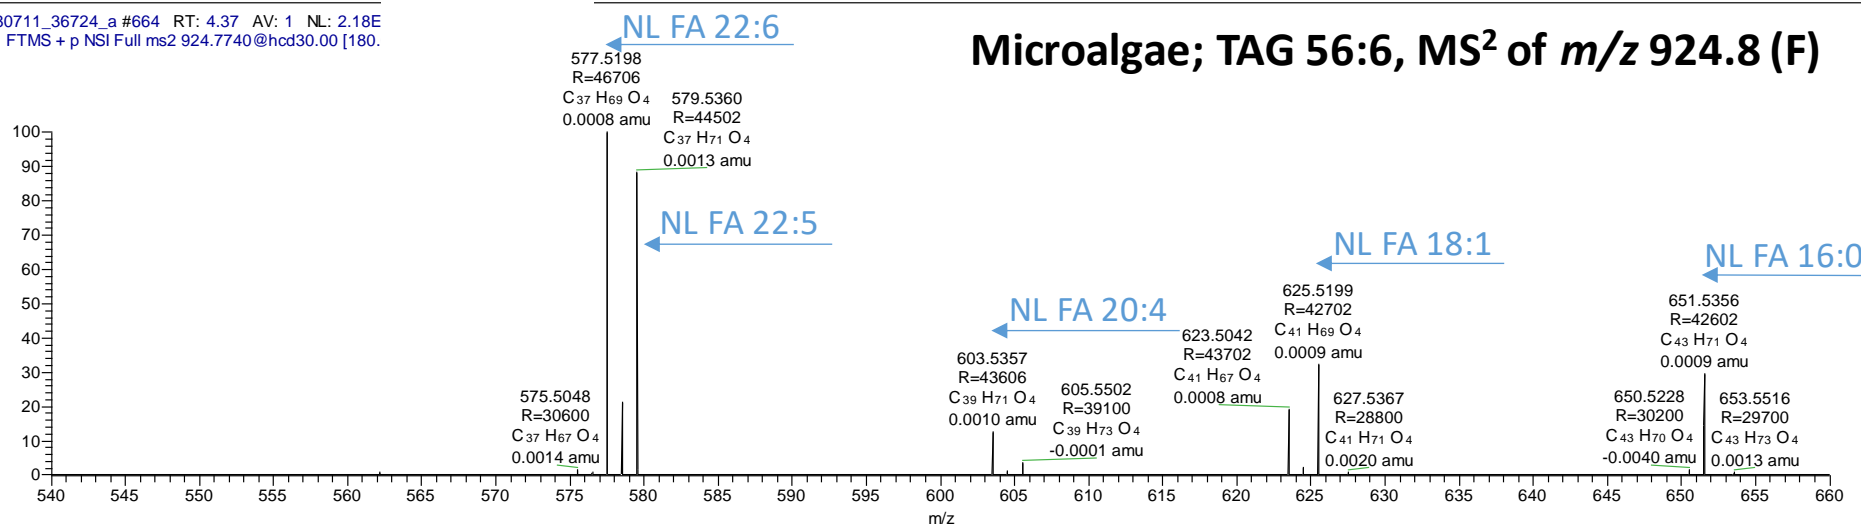

S6 Exemplary MS<sup>2</sup> spectra of TAG 56:6 present in muscle tissue lipid extracts E) control diet F) diet supplemented with microalgae. Major peaks are assigned according to earlier described fragmentation of [TAG+NH<sub>4</sub>]<sup>+</sup> adduct ions that undergo a neutral loss (NL) of the fatty acid and Ammonia [35]. The spectral region (*m/z* 540-660) is shown for better overview on the resulting [DAG-OH]<sup>+</sup> fragment ions.

# Supplement Figure 4

180711\_36722\_a #637 RT: 4.24 AV: 1 NL: 1.86E  
T: FTMS + p NSI Full ms2 896.7460@hcd30.00 [180].

## Control; TAG 54:6, MS<sup>2</sup> of *m/z* 896.7 (G)

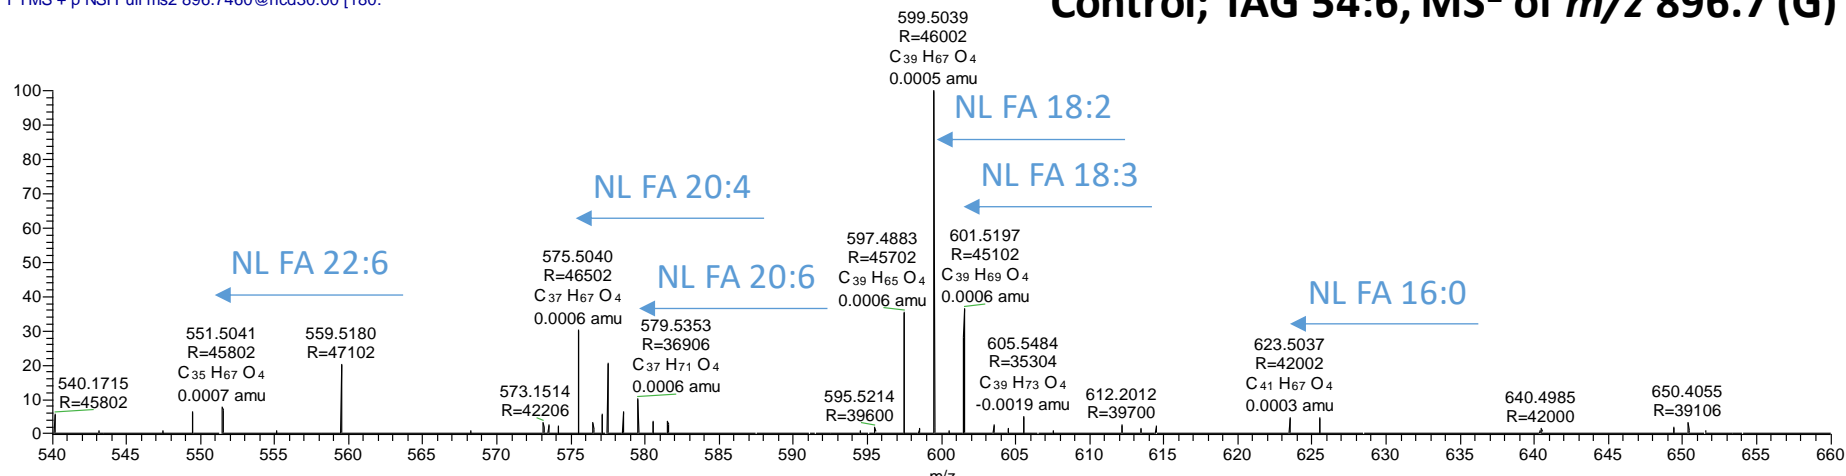

180711\_36724\_a #636 RT: 4.24 AV: 1 NL: 7.50E  
T: FTMS + p NSI Full ms2 896.7460@hcd30.00 [180].

## Microalgae; TAG 54:6, MS<sup>2</sup> of *m/z* 896.7 (H)

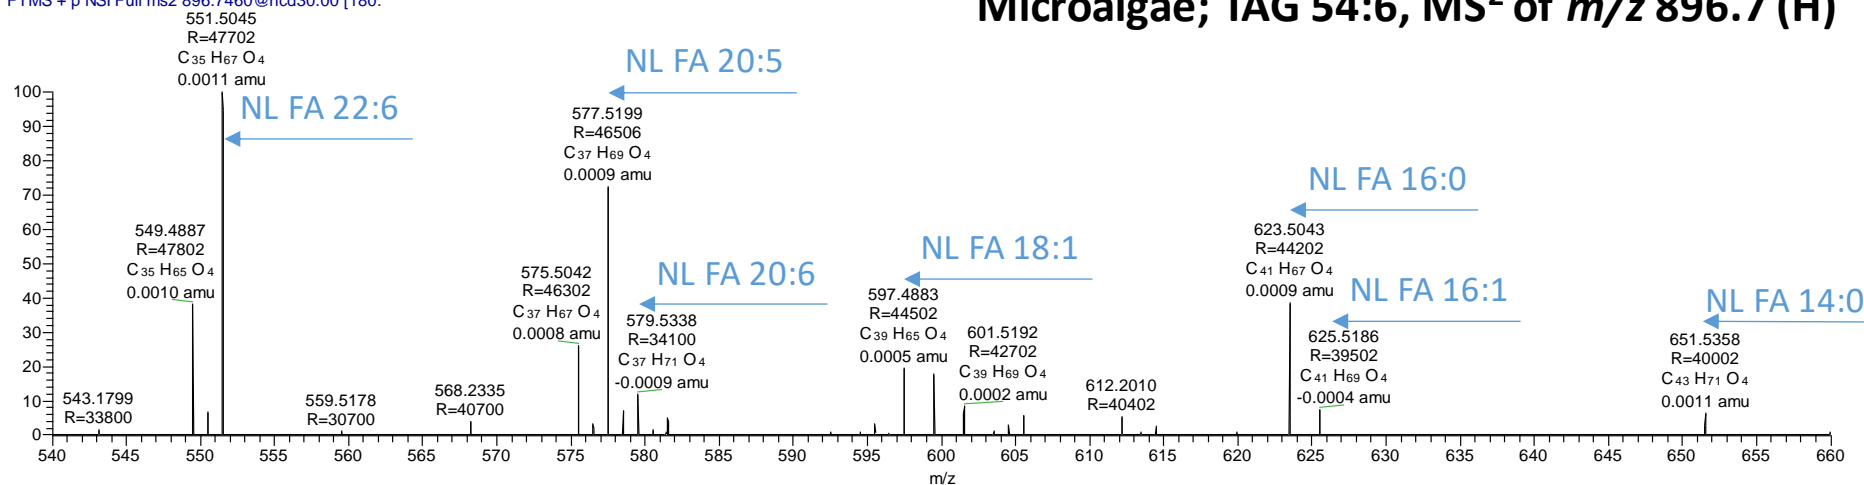

S7 Exemplary MS<sup>2</sup> spectra of TAG 54:6 present in muscle tissue lipid extracts (G) control diet (H) diet supplemented with microalgae. Major peaks are assigned according to earlier described fragmentation of [TAG+NH<sub>4</sub>]<sup>+</sup> adduct ions that undergo a neutral loss (NL) of the fatty acid and ammonia [35]. The spectral region (*m/z* 540–660) is shown for better overview on the resulting [DAG-OH]<sup>+</sup> fragment ions.
